# Supplementary material
Source: publisher site journal article supplement (https://www.dovepress.com/article/329678)
Supplement: Supplementary file 1 [file get_supplementary_file.php]

**SUPPLEMENTARY FIGURES**

**
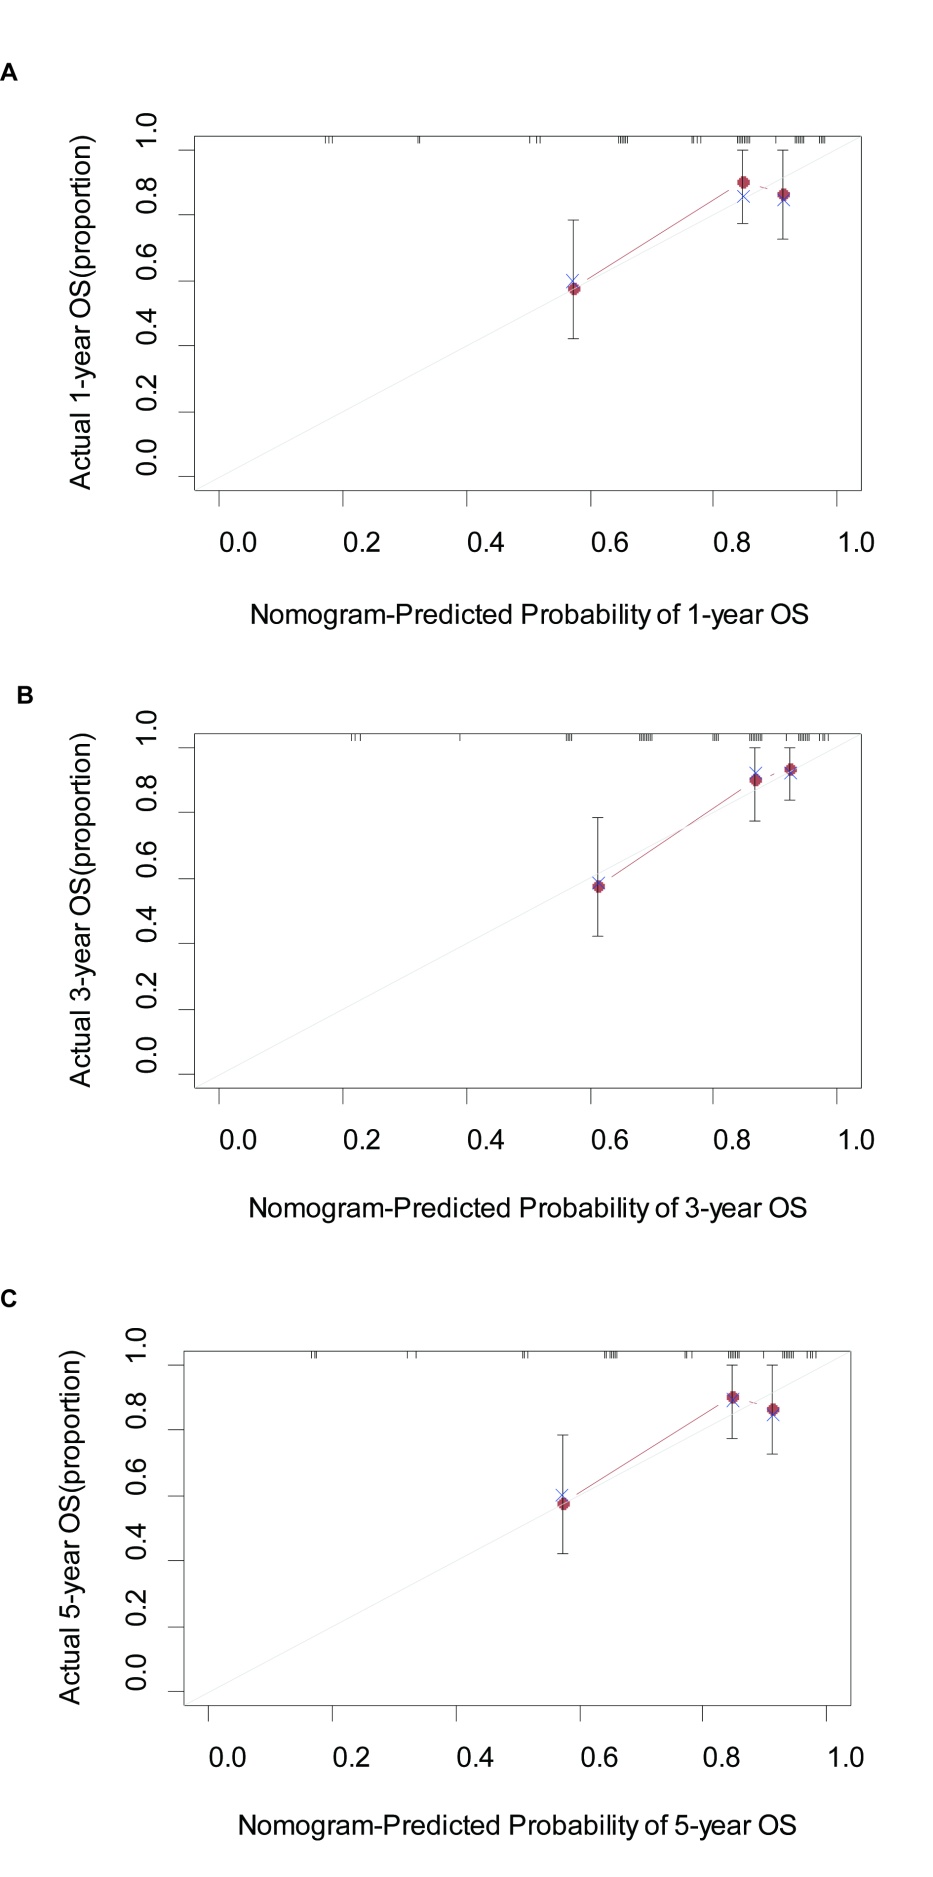
**

**FIGURE S1 |** Calibration plot (A–C) for the nomograms at 1-, 3-, 5- year.

**
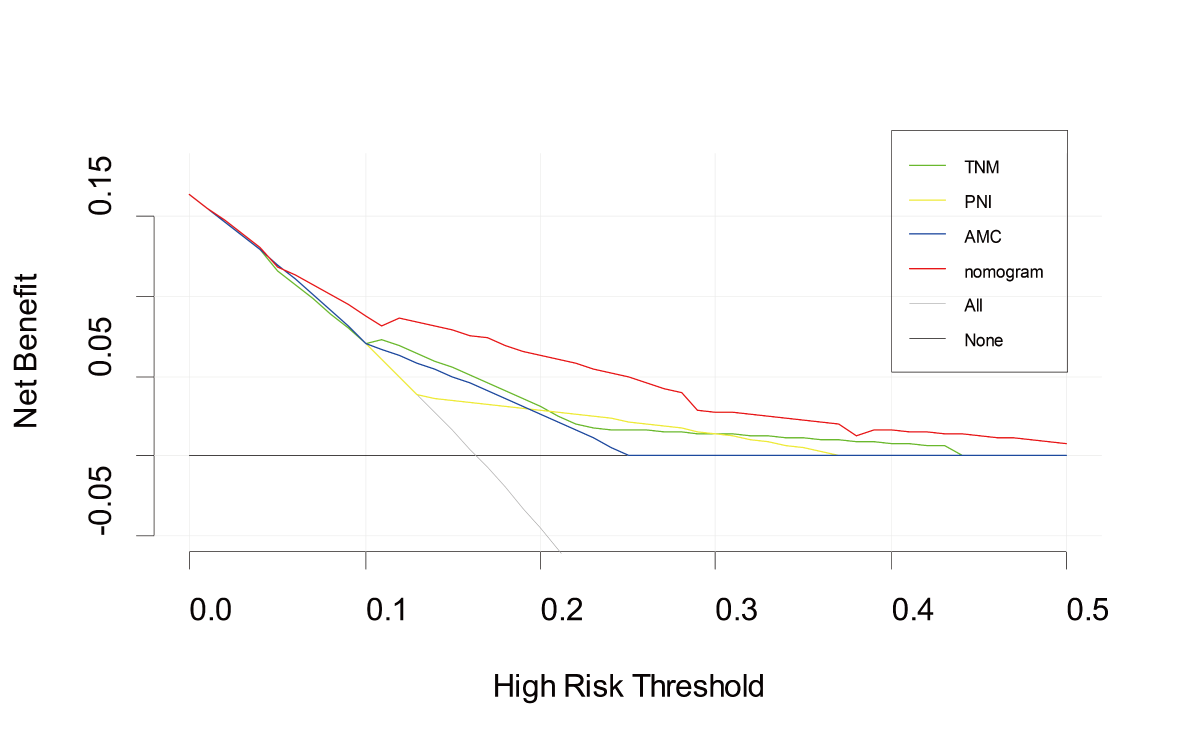
**

**FIGURE S2** **|** Decision curve analysis for the nomogram.


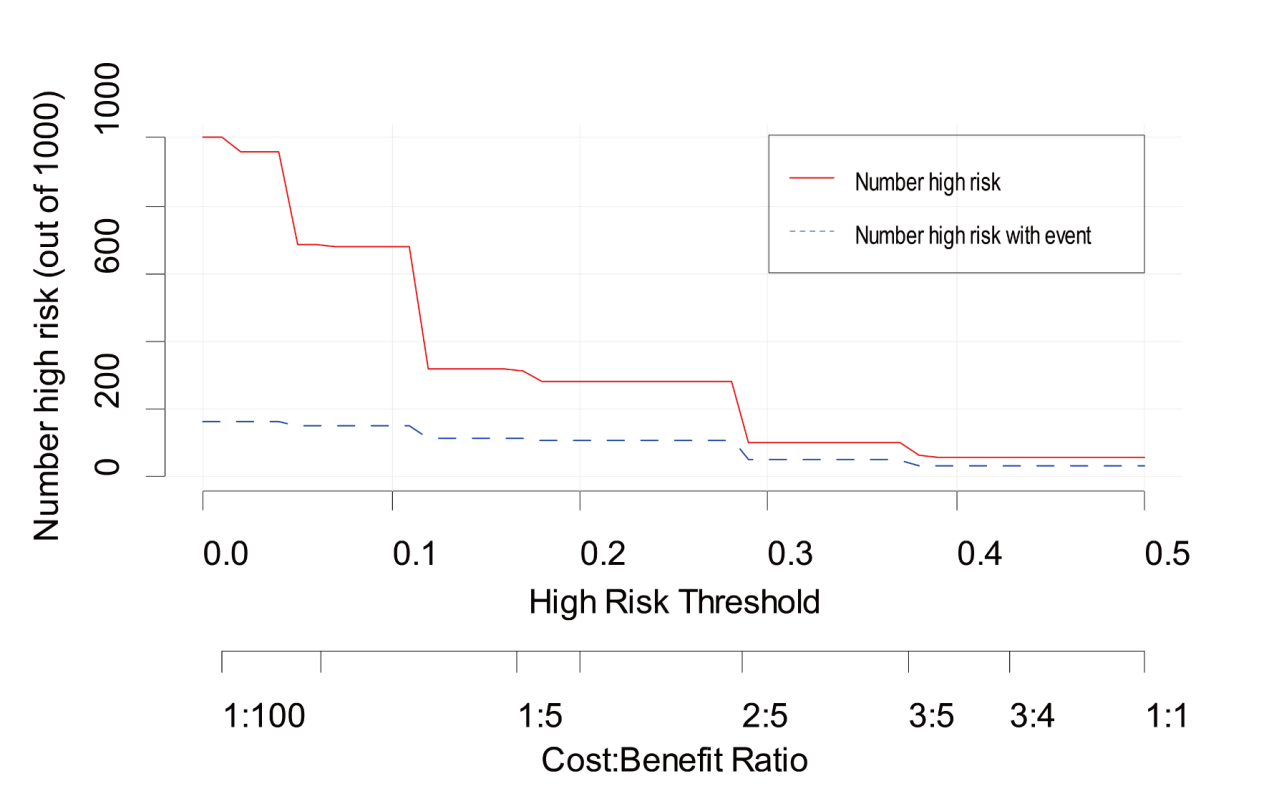


**FIGURE S3 |** Clinical impact curve: the red curve indicates the number of people who are classified as positive (high risk) by the nomogram at each threshold probability; the blue curve is the number of true positives at each threshold probability.
